# Supplementary figures and images for: Risk of cancer in Korean patients with psoriatic arthritis: a nationwide population-based cohort study
Source: HighWire-hosted journal article supplement (doi:10.1136/rmdopen-2022-002874), 2023-03-01

log-log curves

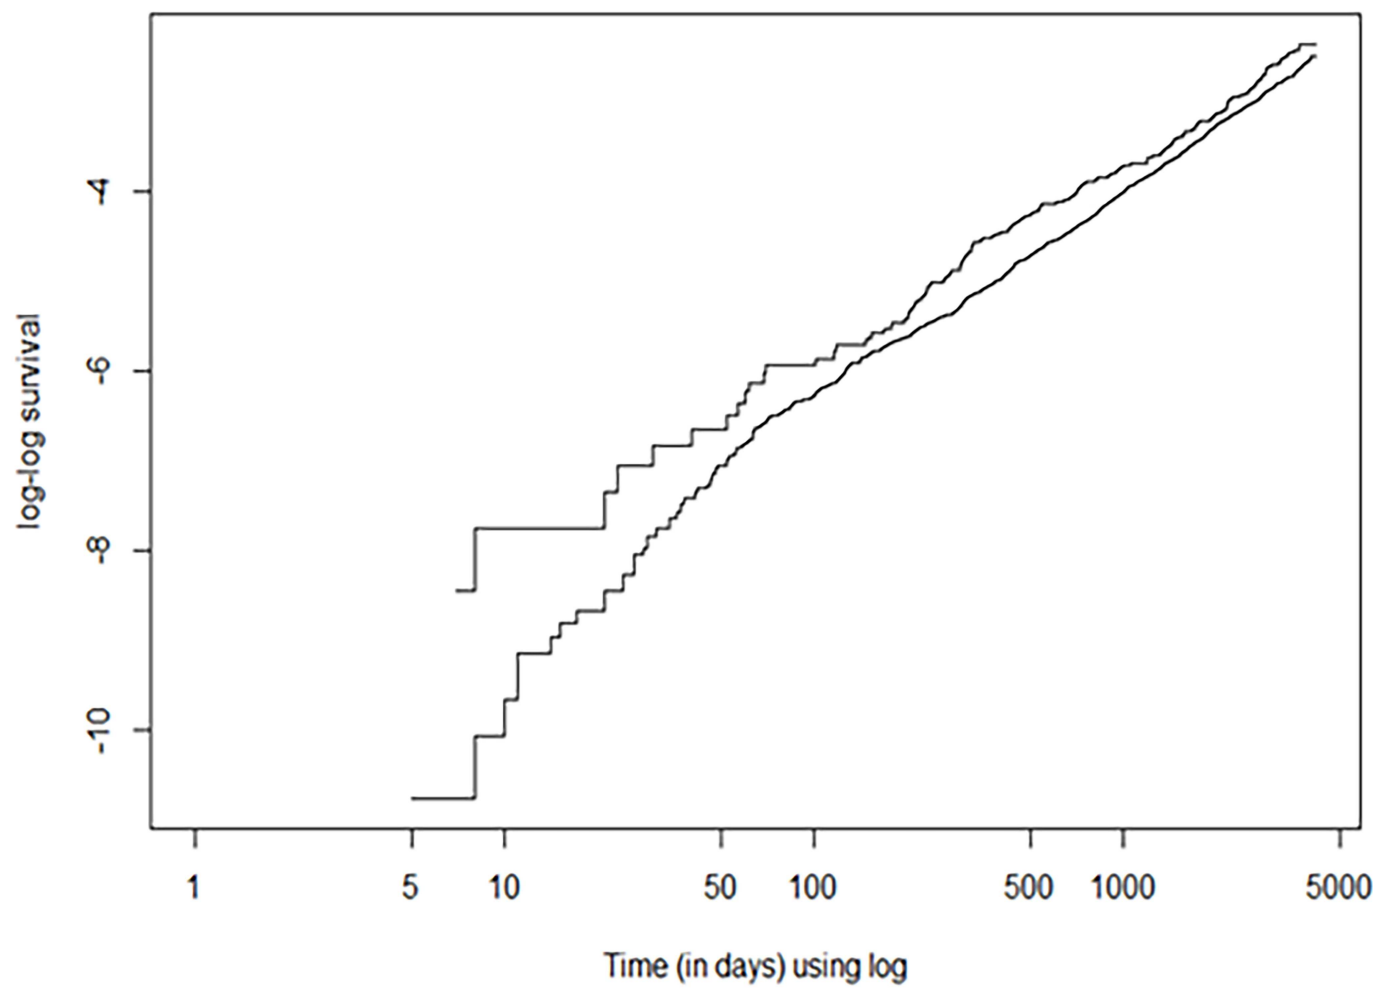

Supplement: rmdopen-2022-002874supp002_data_supplement.pdf [file rmdopen-2022-002874supp002_data_supplement.pdf]
